# Supplementary material
Source: PubMed Central journal article supplement (PMC9790017)
Supplement: 41598_2022_26846_MOESM1_ESM.pdf [file 41598_2022_26846_MOESM1_ESM.pdf]

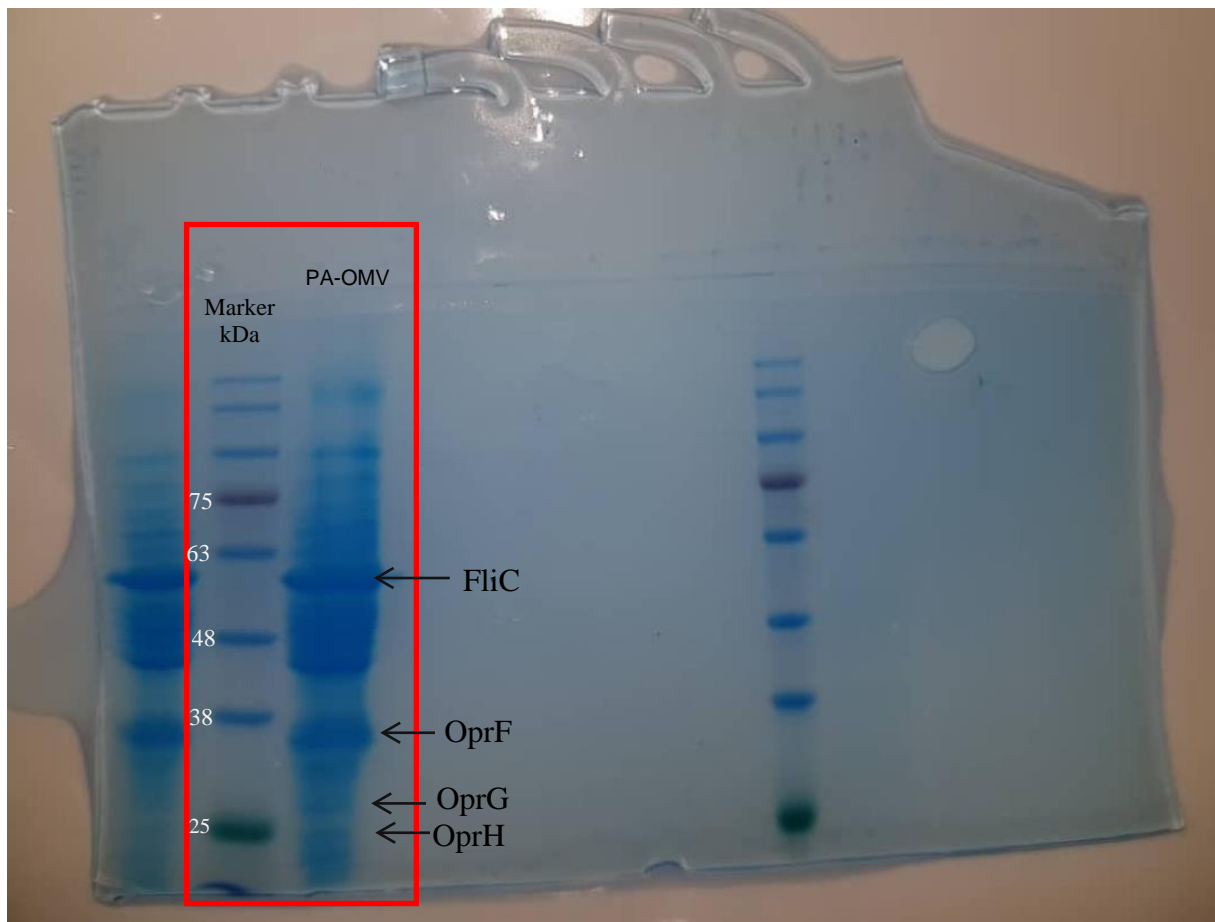

**Supplementary Figure 1**

Coomassie brilliant blue-stained SDS-PAGE of PA-OMVs
